# Supplementary material
Source: Springer Nature journal article supplement (https://www.springermedizin.de/resource/supplementary/12943_2012_1165_MOESM3_ESM.pdf/9552548)
Supplement: MOESM3 [file 9552548]

|               | Oligonucleotides sequence                                                      |
|---------------|--------------------------------------------------------------------------------|
| miR-26a       | 5'-TTCAAGTAATCCAGGATAGGCT -3'                                                  |
| miR-28        | 5'-AAGGAGCTCACAGTCTATTGAG-3'                                                   |
| miR-34a       | 5'-TGGCAGTGTCTTAGCTGGTTGT-3'                                                   |
| miR-145       | 5'-GTCCAGTTTTCCAGGAATCCCT-3'                                                   |
| Let-7b        | 5'-TGAGGTAGTAGGTTGTGTGGTT-3'                                                   |
| miR-21        | 5'-TAGCTTATCAGACTGATGTTGA-3'                                                   |
| miR-100       | 5'-AACCCGTAGATCCGAACCTTGTG-3'                                                  |
| miR-200a      | 5'-CATCTTACCGGACAGTGCTGGA-3'                                                   |
| miR-200b      | 5'-CATCTTACTGGGCAGCATTGGA-3'                                                   |
| miR-485-3p    | 5'-GTCATACACGGCTCTCCTCTCT-3'                                                   |
| cel-miR-39    | 5'-TCACCGGGTGTAATCAGCTTG-3'                                                    |
| U6            | 5'-CGCAAGGATGACACGCAAATTC-3'                                                   |
| NF-YB         | Forward 5'-TCTCTGCAGACTATATTGGAGGAA-3'<br>Reverse 5'-TCATGATCATTTCATGCTGTCC-3' |
| Top2 $\alpha$ | Forward 5'-CAACATGCCAATGAGTGAAA-3'<br>Reverse 5'-GGACTTGGGCCTTAAACTTCA-3'      |
| MDR1          | Forward 5'-AAGGCATTTACTTCAAACCTTGTC-3'<br>Reverse 5'-TGGATTCATCAGCTGCATTTT-3'  |
| CCNB2         | Forward 5'-TGGAAAAGTTGGCTCCAAAG-3'<br>Reverse 5'-TCAGAAAAGCTTGGCAGAGA-3'       |
| GAPDH         | Forward 5'-CACCAGCAGCGACTCTGA-3'<br>Reverse 5'-GATCCAGACTCTGACCTTTTGC-3'       |

**Figure S3**
